# Supplementary material
Source: PubMed Central journal article supplement (PMC1422733)
Supplement: pcbi.0020010.sd001.pdf [file pcbi.0020010.sd001.pdf]

# Supplementary Protocol S1 for

## Dependency Map of Proteins in the Small Ribosomal Subunit

Kay Hamacher<sup>1,2</sup>, Joanna Trylska<sup>1,2,3</sup>, J. Andrew McCammon<sup>1,2,4</sup>

<sup>1</sup> Department of Chemistry and Biochemistry, University of California at San Diego,  
9500 Gilman Drive, La Jolla, CA 92093-0365, USA

<sup>2</sup> Center for Theoretical Biological Physics, University of California at San Diego,  
9500 Gilman Drive, La Jolla, CA 92093-0374, USA

<sup>3</sup> Interdisciplinary Centre for Mathematical and Computational Modelling, Warsaw  
University, Pawińskiego 5a, 02-106 Warsaw, Poland

<sup>4</sup> Howard Hughes Medical Institute and Department of Pharmacology, University of  
California at San Diego, La Jolla, CA 92093-0365, USA

Correspondence should be addressed to:

Kay Hamacher,  
Center for Theoretical Biological Physics and  
Department of Chemistry and Biochemistry, MC 0374  
University of California at San Diego,  
9500 Gilman Drive, La Jolla, CA 92093-0374, USA  
e-mail: hamacher\_at\_ctbp.ucsd.edu  
phone +1 (858) 534 - 7256  
fax +1 (858) 534 - 7697

# 1 General Definitions

$S = \{S2, S3, \dots, S20, THX\}$  is the set of all ribosomal proteins.  $G_M$  is the free energy as obtained from a SCPCP-calculation for a system containing the rRNA and the proteins of set  $M$ .

## 2 One Protein Removal

The algorithm in a pseudo-programming language reads

```

For each  $i \in S$ 
  Compute  $\Delta G_{\text{bind}}^i = G_S - G_{S \setminus \{i\}} - G_{\{i\}}$ 
  Construct a vector of ranks  $\vec{r}$  according to the respective  $\Delta G_{\text{bind}}^i$ 

For each  $i \in S$ 
   $S^{(i)} = S \setminus \{i\}$ 
  For each  $j \in S^{(i)}$ 
    Compute  $\Delta G_{\text{bind}}^{(i),j} = G_{S^{(i)}} - G_{S^{(i)} \setminus \{j\}} - G_{\{j\}}$ 
    Construct a vector of ranks  $\vec{r}^{(i)}$  according to the respective  $\Delta G_{\text{bind}}^{(i),j}$ 

Construct the sets  $I^{(i)}$  of all  $j$  that were pushed backwards in
the ranking by  $\Delta_r^{(i),j}$  places in comparison to  $\vec{r}$ .
These sets are the (by  $i$ ) influenced proteins.

```

The obtained  $\Delta_r^{(i),j}$  are the weights on the arrows in figure 2 of the main manuscript. The arrows point from a protein  $i$  that (negatively) influences the ranking of a protein  $j$ .

## 3 Two Protein Removal

The algorithm in a pseudo-programming language reads

```

For each  $i \in S$ 
   $S^{(i)} = S \setminus \{i\}$ 
  For each  $j \in S^{(i)}$ 
     $S^{(i,j)} = S \setminus \{i, j\}$ 
    For each  $k \in S^{(i,j)}$ 
      Compute the tensor element  $\Delta G_{i,j}^k = G_{S^{(i,j)}} - G_{S^{(i,j)} \setminus \{k\}} - G_{\{k\}}$ 
      Set  $\Delta G_{ii}^k = \Delta G_{ij}^i = \Delta G_{ji}^i = 0$ 

For each  $k \in S$ 
  Diagonalize the  $(20 \times 20)$ -matrix  $\Delta G^k$  and obtain
  the eigenvalues  $\lambda_l$  and eigenvectors  $\vec{u}_l$ .
  Obtain for  $l \in \{1, 20\}$  the most probable entry-value  $U_l$  in  $\vec{u}_l$ .
  Construct the sets  $I_1^k$  and  $I_{20}^k$  whose elements are given by the  $a$ 
  index of the  $\vec{u}_l$  for which  $\left| \frac{\vec{u}_{1,a}}{U_1} \right| > 1.01$  and  $\left| \frac{\vec{u}_{20,a}}{U_{20}} \right| > 1.10$ , respectively.

```

The sets  $I_1^k$  and  $I_{20}^k$  contain the proteins that influence  $k$ . In figure 4 of the main text we again draw arrows from a protein  $a$  to the influenced protein  $k$ . The set  $I_{20}^k$  contains also non-local effects as discussed in the main text.

For the diagonalization procedure we applied the SVD-algorithm in the version described by Press et al. This is necessary - as mentioned in the main text - because of the additional null mode. For a general application we note that the procedure becomes more accurate for larger systems (larger number of chains) as small deviations in  $\Delta G^k$  (e.g. due to numerics or parametrization) tend to be less relevant the larger the matrices  $\Delta G^k$ .

Note that the matrices  $\Delta G_{ij}^k$  are symmetric and one can therefore save a factor of 2 in CPU-time by reducing the loop over  $j$  to  $j > i$  with  $S_i > S_j \iff i > j$  and setting  $G_{ij} = G_{ji}$  afterwards.
